# Supplementary material
Source: PubMed Central journal article supplement (PMC8447430)
Supplement: POPS-42-827-s001.pdf [file POPS-42-827-s001.pdf]

## Supplementary Information and Appendix

### Supplementary Information

Table S1. Proportion of respondents in each group (unweighted)

|                           | Blame     |         | No-Blame  |         |
|---------------------------|-----------|---------|-----------|---------|
|                           | Unmatched | Matched | Unmatched | Matched |
| <b>Gender</b>             |           |         |           |         |
| Male                      | 58.35%    | 59.56%  | 60.17%    | 60.17%  |
| Female                    | 41.65%    | 40.44%  | 39.83%    | 39.83%  |
| <b>Age Group</b>          |           |         |           |         |
| < 25                      | 26.54%    | 27.17%  | 27.30%    | 27.30%  |
| 25-35                     | 29.29%    | 29.30%  | 29.90%    | 29.90%  |
| 35-45                     | 19.45%    | 19.80%  | 19.43%    | 19.43%  |
| 45-55                     | 13.65%    | 13.25%  | 12.53%    | 12.53%  |
| 55+                       | 11.07%    | 10.48%  | 10.84%    | 10.84%  |
| <b>Religion</b>           |           |         |           |         |
| Hindus                    | 85.94%    | 85.84%  | 82.99%    | 82.99%  |
| Muslims                   | 8.67%     | 8.96%   | 11.32%    | 11.32%  |
| Christians                | 1.87%     | 1.69%   | 1.63%     | 1.63%   |
| Sikhs                     | 1.58%     | 1.51%   | 1.63%     | 1.63%   |
| Others                    | 1.93%     | 2.00%   | 2.42%     | 2.42%   |
| <b>Location</b>           |           |         |           |         |
| Rural                     | 39.78%    | 44.98%  | 38.56%    | 46.31%  |
| Semi-Urban                | 16.40%    | 15.98%  | 15.13%    | 15.13%  |
| Urban                     | 43.82%    | 39.04%  | 46.31%    | 38.56%  |
| <b>Vote 2019</b>          |           |         |           |         |
| INC/UPA                   | 12.89%    | 11.92%  | 11.26%    | 11.26%  |
| BJP/NDA                   | 54.30%    | 52.36%  | 52.85%    | 52.85%  |
| Others                    | 26.88%    | 26.52%  | 25.90%    | 25.90%  |
| Did Not Vote              | 9.26%     | 9.20%   | 9.99%     | 9.99%   |
| <b>Facebook/Instagram</b> |           |         |           |         |
| Do not use                | 23.91%    | 23.80%  | 24.70%    | 24.70%  |
| Use                       | 76.09%    | 76.20%  | 75.30%    | 75.30%  |
| N                         | 1707      | 1652    | 1652      | 1652    |

The above data the table are not weighted. Data used in the OLS regression models are weighted. The weight variable was provided by CVoter and is a combination of Gender, Age, Caste, Religion, Urban/Rural, Lok Sabha 2019 vote as well as the state population size in proportion to all the states.

Table S2. Number of respondents in each group

|                           | <b>Blame</b>     |                | <b>No-Blame</b>  |                |
|---------------------------|------------------|----------------|------------------|----------------|
|                           | <b>Unmatched</b> | <b>Matched</b> | <b>Unmatched</b> | <b>Matched</b> |
| <b>Gender</b>             |                  |                |                  |                |
| Male                      | 996              | 994            | 994              | 984            |
| Female                    | 711              | 658            | 658              | 668            |
| <b>Age Group</b>          |                  |                |                  |                |
| < 25                      | 453              | 451            | 451              | 449            |
| 25-35                     | 500              | 494            | 494              | 484            |
| 35-45                     | 332              | 321            | 321              | 327            |
| 45-55                     | 233              | 207            | 207              | 219            |
| 55+                       | 189              | 179            | 179              | 173            |
| <b>Religion</b>           |                  |                |                  |                |
| Hindus                    | 1467             | 1371           | 1371             | 1418           |
| Muslims                   | 148              | 187            | 187              | 148            |
| Christians                | 32               | 27             | 27               | 28             |
| Sikhs                     | 27               | 27             | 27               | 25             |
| Others                    | 33               | 40             | 40               | 33             |
| <b>Location</b>           |                  |                |                  |                |
| Rural                     | 679              | 637            | 637              | 645            |
| Semi-Urban                | 280              | 250            | 250              | 264            |
| Urban                     | 748              | 765            | 765              | 743            |
| <b>Vote 2019</b>          |                  |                |                  |                |
| INC/UPA                   | 213              | 186            | 186              | 197            |
| BJP/NDA                   | 897              | 873            | 873              | 865            |
| Others                    | 444              | 428            | 428              | 439            |
| DNV                       | 153              | 165            | 165              | 151            |
| <b>Facebook/Instagram</b> |                  |                |                  |                |
| Do not use                | 395              | 408            | 408              | 393            |
| Use                       | 1306             | 1244           | 1244             | 1259           |
| <b>N</b>                  | <b>1707</b>      | <b>1652</b>    | <b>1652</b>      | <b>1652</b>    |

## Appendix

### Two key social welfare policies

Analysis of social welfare policies in party manifestos in India may not reveal the significant differences between parties that in higher-income democracies are often described as ideologically left or right, which may help readers to understand why Congress or United Progressive Alliance (UPA) voters in our model were significantly different from voters for other regional parties (excluding non-BJP National Democratic Alliance (NDA) parties), in their willingness to allay blame for the initial spread of the virus to the Modi government. For example, in the 2014 national election, party manifestos from Congress, the new Aam Aadmi Party (AAP), and the BJP each addressed the issue of healthcare. Congress promised “right to health,” AAP promised quality universal healthcare access, and BJP promised “radical reforms” in “healthcare delivery, medical education, and the financing of healthcare” (Chatterjee, 2014: 1-3). The Ayushman Bharat Pradhan Mantri Jan Arogya Yojana (AB-PMJAY), colloquially known as “Modicare,” was approved by the Government of India in March 2018. AB-PMJAY is described by healthcare researchers as “an ambitious reform to the Indian health system that seeks to provide financial health protection for 500 million of the most vulnerable Indians and halt the slide of the 50–60 million Indians who fall into poverty annually as a result of medical-related expenditure” (Angell, Prinja, Gupt, Jha, & Jan 2019).

Another example of the lack of ideological distance between competing parties concerns affirmative action measures that were part of India’s founding Constitution. These measures were drafted by lawyer, scholar and activist B.R. Ambedkar, known as the father of India’s Constitution who was born in a Dalit caste, later became Buddhist and launched a social movement for lower caste Hindus to leave the religion as he did (Rodriguez, 2002). According to his grandson,

Ambedkar saw political reservations in the Lok Sabha and state-level Assembly constituencies as necessary only for ten years in order to bring a transformational boost in their engagement in the political process to Scheduled Castes (SC), Scheduled Tribes (ST) and Other Backward Classes (OBC), whereas reservations in education and government jobs were to continue (Khapre 2020). Reservations have been extended to this day while those with lower incomes in the General Castes, who receive no affirmative action benefits, have protested to be included. Reservations have resulted in nearly half the seats in higher education and government jobs reserved for individuals from SC, ST and OBC groups. Asher, Novosad and Rafkins (2020) demonstrate the positive economic impact of affirmative action on Scheduled Castes.

In January 2019, three months before the official national election campaign began, the incumbent BJP government promised to add a 10% economic reservation for those in the lowest income groups who have not benefitted from existing affirmative action. Research on intergenerational mobility in education across cohorts in India, using a new “bottom half mobility” measure shows “Muslim disadvantage cannot be explained by occupational patterns, fertility, differential returns to education, or location” and concludes “...the effect of affirmative action on Scheduled Castes may be large enough to explain all of the Muslim–Scheduled Caste gap” (Asher, Novosad and Rafkins 2020: see Figures 6, p. 44. 10 p. 48, 12 p. 50, A6 p.61). The 10% economic reservation would include Muslims who, as a group, have never been accorded the protections of quotas provided for SC, ST and OBCs in the Constitution (Rukmini, 2019).

## **References**

Angell, B. J., Prinja, S., Gupta, A., Jha, V., and Jan, S. (2019). The Ayushman Bharat Pradhan

Mantri Jan Arogya Yojana and the path to universal health coverage in India:

Overcoming the challenges of stewardship and governance. *PLoS medicine*, 16(3), e1002759. <https://doi.org/10.1371/journal.pmed.1002759>

Asher, S., Novosad, P., Rafkins, C. (2020). Intergenerational Mobility in India: New Methods and Estimates Across Time, Space, and Communities.

<https://www.dartmouth.edu/~novosad/anr-mobility.pdf>

Chatterjee, P. (2014). Manifestos for health: What the Indian political parties have promised.

*BMJ: British Medical Journal*, 348. Retrieved February 28, 2021, from

<https://www.jstor.org/stable/26513825>

Khapre, S. (2020, July 27). ‘Only questioning political reservations, quota for SC/STs in govt jobs & education must continue’. *The Indian Express*.

<https://indianexpress.com/article/india/only-questioning-political-reservations-quota-for-sc-sts-in-govt-jobs-education-must-continue-6524781/>

Rodriguez, V. (ed.). (2002). *The Essential Writings of B.R. Ambedkar*. Oxford University Press.

Rukmini, S. (2019, Jan. 10) “Why Muslims have the first claim on any new ‘backward’ quota,”

*LiveMint*. <https://www.livemint.com/Politics/3uqMGQ3o4UMhtdHnxaGocO/What-the-general-category-reservation-bill-means-for-Muslims.html>
